# Supplementary material for: A Low Driving-Voltage Hybrid-Electrolyte Electrochromic Window with Only Ferreous Redox Couples
Source: MDPI journal article supplement (doi:10.3390/nano13010213), 2023-01-03
Supplement: s1 [file s1]

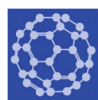

# A Low Driving-Voltage Hybrid-Electrolyte Electrochromic Window with Only Ferreous Redox Couples

Jisheng Song <sup>1,†</sup>, Bingkun Huang <sup>1,†</sup>, Yinyingjie Xu <sup>1</sup>, Kunjie Yang <sup>1</sup>, Yingfan Li <sup>1</sup>, Yuqi Mu <sup>2</sup>, Lingyu Du <sup>1</sup>, Shan Yun <sup>3,\*</sup> and Litao Kang <sup>1,\*</sup>

<sup>1</sup> College of Environment and Materials Engineering, Yantai University, Yantai 264005, China

<sup>2</sup> School of Materials Science and Engineering, University of Science and Technology, Beijing 100083, China

<sup>3</sup> Key Laboratory for Palygorskite Science and Applied Technology of Jiangsu Province, Huaiyin Institute of Technology, Huai'an 223003, China

\* Correspondence: yunshan@hyit.edu.cn (S.Y.); kanglitao@ytu.edu.cn (L.K.)

† These authors contributed equally to this paper and are co-first authors.

**Table S1.** Quantitative analyses of the PB film's initial CV curve.

| Peak location (V) |        | Capacity (mC cm <sup>-2</sup> ) |        | Initial CEs (%) | Polarization potential (V) |
|-------------------|--------|---------------------------------|--------|-----------------|----------------------------|
| Cathodic          | Anodic | Cathodic                        | Anodic |                 |                            |
| 0.12              | 0.32   | 14.60                           | 12.93  | 88.56           | 0.20                       |

**Table S2.** Quantitative analyses of the redox electrolyte's initial CV curve.

| Peak location (V) |        | Capacity (mC) |        | Initial CEs (%) | Polarization potential (V) |
|-------------------|--------|---------------|--------|-----------------|----------------------------|
| Cathodic          | Anodic | Cathodic      | Anodic |                 |                            |
| 0.14              | 0.35   | 18.94         | 19.17  | 98.80           | 0.21                       |

**Table S3.** Electrochromic performance comparison of different PB-based devices.

| Counter electrode                                                           | Driving voltage (V) | Coloration efficiency (cm <sup>2</sup> C <sup>-1</sup> ) @ Bias potential (V) | Transmittance modulation (ΔT) @ wavelength | Ref       |
|-----------------------------------------------------------------------------|---------------------|-------------------------------------------------------------------------------|--------------------------------------------|-----------|
| ZnO                                                                         | -2.0 ~ 1.3          | ~                                                                             | 52.0% @ 686 nm                             | [1]       |
| Zn                                                                          | 0.5 ~ 1.9           | 76.8 @ 1.9                                                                    | 84.9% @ 633 nm                             | [2]       |
| Zn                                                                          | 0.8 ~ 1.6           | 131.5 @ 1.6                                                                   | 67.2% @ 632.8 nm                           | [3]       |
| Al                                                                          | 0.8 ~ 2.1           | ~                                                                             | 52.2% @ 670 nm                             | [4]       |
| FTO                                                                         | -1.2 ~ 1.8          | 87.4 @ 1.8                                                                    | 44.9% @ 680 nm                             | [5]       |
| PEDOT-EthC6                                                                 | -1.4 ~ 1.8          | 563 @ 1.8                                                                     | 3 ~ 50% @ visible light                    | [6]       |
| Poly(butyl viologen)                                                        | -1 ~ 1.7            | 157 @ 1.7                                                                     | 62.5% @ 545 nm                             | [7]       |
| [Fe(CN) <sub>6</sub> ] <sup>3-</sup> / [Fe(CN) <sub>6</sub> ] <sup>4-</sup> | -0.6 ~ 0.4          | 77.75 @ 0.4                                                                   | 78.5% @ 633 nm*                            | This work |

\*A box-like device consisting of two bare FTO glasses and 1mm-thick electrolyte is used as the baseline for transmittance test.

**Table S4.** Quantitative analyses of the initial CV curves of the PB-ECW and PFSA/PB-ECW devices.

| ECW    | Peak location (V) |        | Capacity (mC cm <sup>-2</sup> ) |           | Initial CEs (%) | Polarization potential (V) |
|--------|-------------------|--------|---------------------------------|-----------|-----------------|----------------------------|
|        | Cathodic          | Anodic | Inserted                        | Extracted |                 |                            |
| PB-ECW | -0.27             | 0.25   | 27.16                           | 17.89     | 65.87           | 0.52                       |

|             |       |      |       |       |       |      |
|-------------|-------|------|-------|-------|-------|------|
| PFSA/PB-ECW | -0.11 | 0.04 | 20.72 | 18.66 | 90.06 | 0.15 |
|-------------|-------|------|-------|-------|-------|------|

**Table S5.** Optical memory abilities of the PB-ECW and PFSA/PB-ECW devices at different open-circuit aging times.

| Rest times in open circuit state | Transmittance of PB-ECW |          |            | Transmittance of PFSA/PB-ECW |          |            |
|----------------------------------|-------------------------|----------|------------|------------------------------|----------|------------|
|                                  | Colored                 | Bleached | $\Delta T$ | Colored                      | Bleached | $\Delta T$ |
| 0 s                              | 7.9                     | 14.8     | 6.9        | 5.6                          | 83.9     | 78.3       |
| 300 s                            | 11.2                    | 12.1     | 0.9        | 5.7                          | 58.2     | 52.3       |
| 1500 s                           | 11.3                    | 11.7     | 0.4        | 5.9                          | 39.3     | 33.4       |

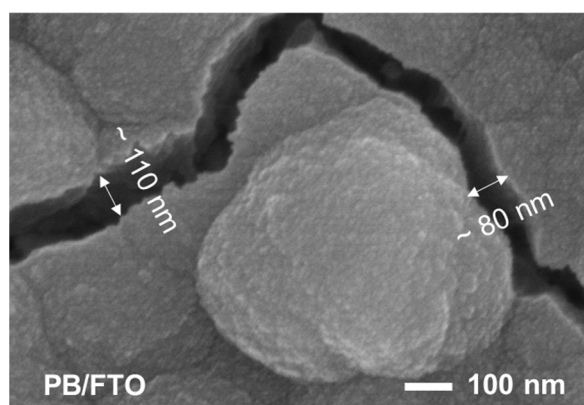

**Figure S1.** SEM images of the electrodeposited PB films ( $50 \mu\text{A cm}^{-2}$  for 300s) after air-drying.

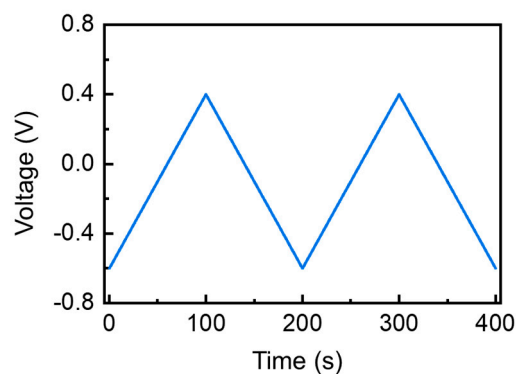

**Figure S2.** Profile of the cyclic voltammetric (CV) test stimulating the bleaching/coloring switching processes of PFSA/PB-ECW.

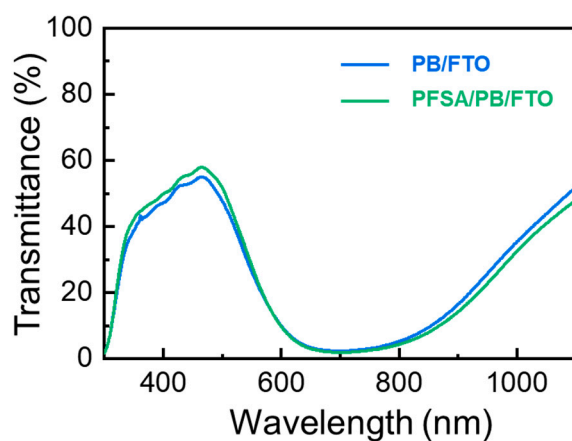

**Figure S3.** Transmittance spectra of PB/FTO and PFSA/PB/FTO.

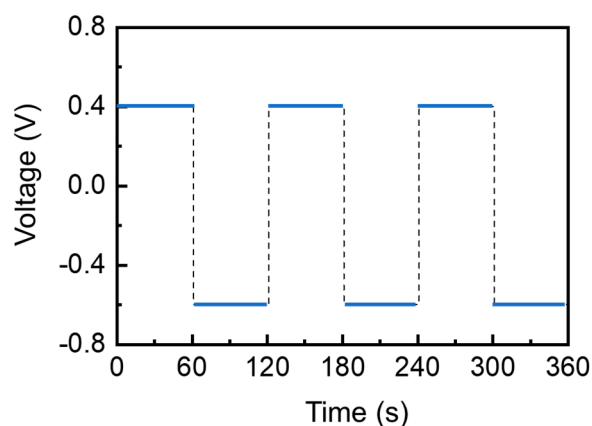

**Figure S4.** Profile of the square-wave voltage stimulating the bleaching/coloring switching processes of PFSA/PB-ECW in the chronoamperometry (CA) test.

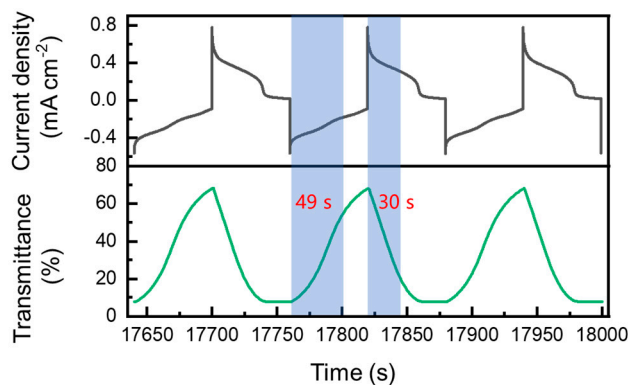

**Figure S5.** Chronoamperometry (CA) curves and corresponding transmittance evolution at the end of cycling test.

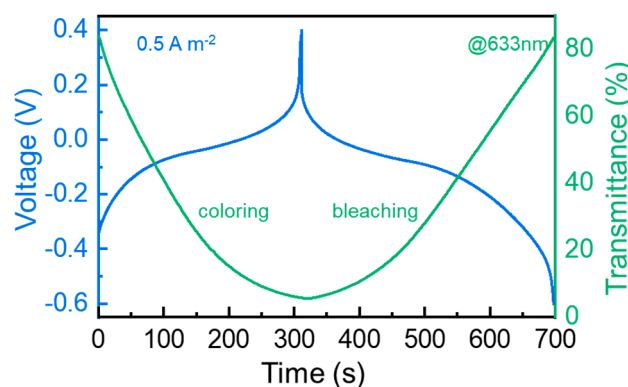

**Figure S6.** galvanostatic charge/discharge (GCD, blue lines) profiles and transmittance variation (green lines).

## References

1. Pham, N.S.; Phan, P.T.Q.; Nguyen, B.N.; Le, V.X. Enhanced stability of electrochromic devices based on Prussian blue by tuning electrolyte ions and charge/discharge balance. *J. Appl. Electrochem.* **2022**, 1–10, <https://doi.org/10.1007/s10800-022-01747-1>.
2. Wang, B.; Cui, M.; Gao, Y.; Jiang, F.; Du, W.; Gao, F.; Kang, L.; Zhi, C.; Luo, H. A Long-Life Battery-Type Electrochromic Window with Remarkable Energy Storage Ability. *Sol. RRL* **2020**, 4, 1900425.
3. Li, H.; Zhang, W.; Elezzabi, A.Y. Transparent Zinc-Mesh Electrodes for Solar-Charging Electrochromic Windows. *Adv. Mater.* **2020**, 32, 2003574. <https://doi.org/10.1002/adma.202003574>.

4. Ma, D., Eh, A.L.-S., Cao, S., Lee P.S., Wang, J. Wide-Spectrum Modulated Electrochromic Smart Windows Based on MnO<sub>2</sub>/PB Films. *ACS Appl. Mater. Interfaces*, **2022**, 14, 1443–1451.
5. Qian, J.; Ma, D.; Xu, Z.; Li, D.; Wang, J. Electrochromic properties of hydrothermally grown Prussian blue film and device. *Sol. Energy Mater. Sol. Cells* **2018**, 177, 9–14, <https://doi.org/10.1016/j.solmat.2017.08.016>.
6. Macher, S., Schott M., Dontigny M., Guerfi A., Zaghib K., Posset U., Löbmann P. Large-Area Electrochromic Devices on Flexible Polymer Substrates with High Optical Contrast and Enhanced Cy-cling Stability. *Adv. Mater. Technol.*, **2020**, 6, 2000836, <https://doi.org/10.1002/admt.202000836>.
7. Fan, M.-S.; Kao, S.-Y.; Chang, T.-H.; Vittal, R.; Ho, K.-C. A high contrast solid-state electrochromic device based on nano-structural Prussian blue and poly(butyl viologen) thin films. *Sol. Energy Mater. Sol. Cells* **2016**, 145, 35–41. <https://doi.org/10.1016/j.solmat.2015.06.031>.
